# Supplementary material for: Highly active ZIF-8@CNT composite catalysts as cathode materials for anion exchange membrane fuel cells
Source: Royal Society of Chemistry journal article supplement (doi:10.1039/d3im00081h), 2023-01-01
Supplement: d3im00081h1.pdf [file d3im00081h1.pdf]

## Supplementary Material

### Highly-active ZIF-8@CNT composite catalysts as cathode materials for anion exchange membrane fuel cells

Rohit Kumar<sup>a</sup>, Marek Mooste<sup>a</sup>, Zubair Ahmed<sup>a</sup>, Srinu Akula<sup>a</sup>, Ivar Zekker<sup>a</sup>, Margus Marandi<sup>a</sup>, Maike Käär<sup>a</sup>, Jaan Leis<sup>a</sup>, Arvo Kikas<sup>b</sup>, Alexey Treshchalov<sup>b</sup>, Markus Otsus<sup>b</sup>, Jaan Aruväli<sup>c</sup>, Vambola Kisand<sup>b</sup>, Aile Tamm<sup>b</sup>, Kaido Tammeveski<sup>a\*</sup>

<sup>a</sup>*Institute of Chemistry. University of Tartu. Ravila 14a. 50411 Tartu. Estonia*

<sup>b</sup>*Institute of Physics. University of Tartu. W. Ostwald Str. 1. 50411 Tartu. Estonia*

<sup>c</sup>*Institute of Ecology and Earth Sciences. University of Tartu. Vanemuise 46, 51014 Tartu, Estonia*

\*Corresponding author, e-mail address: [kaido.tammeveski@ut.ee](mailto:kaido.tammeveski@ut.ee) (K. Tammeveski)

## Tables

**Table S1** Amounts of ZIF-8, MWCNT and Fe/Co salts used to prepare ZIF-8 based catalyst materials.

| Catalyst                                 | MWCNTs<br>(mg) | Fe(OAc) <sub>2</sub><br>(mg) | Co(OAc) <sub>2</sub><br>(mg) | ZIF-8<br>(mg) |
|------------------------------------------|----------------|------------------------------|------------------------------|---------------|
| ZNT-900                                  | 100            | -                            | -                            | 104.9         |
| Fe-ZNT-900                               | 100            | 8.2 (2.5 wt%)                | -                            | 104.9         |
| Co-ZNT-900                               | 100            | -                            | 15.37 (5 wt%)                | 104.9         |
| Fe <sub>1</sub> Co <sub>2</sub> -ZNT-900 | 100            | 5.4 (1.65 wt%)               | 10.3 (3.35 wt%)              | 104.9         |
| Fe <sub>1</sub> Co <sub>1</sub> -ZNT-900 | 100            | 16.36 (5 wt%)                | 15.37 (5 wt%)                | 104.9         |

**Table S2** The value of R<sub>2</sub>, I<sub>D1</sub>/I<sub>G</sub>, W<sub>D1</sub>, and W<sub>G</sub> calculated from the deconvolution of Raman bands for all the catalyst materials.

| Catalyst                                 | R <sub>2</sub> | I <sub>D1</sub> /I <sub>G</sub> | W <sub>D1</sub> , cm <sup>-1</sup> | W <sub>G</sub> , cm <sup>-1</sup> |
|------------------------------------------|----------------|---------------------------------|------------------------------------|-----------------------------------|
| ZNT-900                                  | 0.53           | 1.52                            | 78                                 | 59                                |
| Fe-ZNT-900                               | 0.53           | 1.58                            | 79                                 | 58                                |
| Co-ZNT-900                               | 0.55           | 1.60                            | 86                                 | 61                                |
| Fe <sub>1</sub> Co <sub>2</sub> -ZNT-900 | 0.57           | 1.78                            | 104                                | 65                                |
| Fe <sub>1</sub> Co <sub>1</sub> -ZNT-900 | 0.56           | 1.73                            | 90                                 | 63                                |

**Table S3.** Surface elemental composition and functional forms of the catalysts obtained from XPS analysis.

| Catalyst                    |                             | ZNT-900     |       | Fe-ZNT-900 |       | Co-ZNT-900 |       | Fe <sub>1</sub> Co <sub>2</sub> -ZNT-900 |       | Fe <sub>1</sub> Co <sub>1</sub> -ZNT-900 |       |
|-----------------------------|-----------------------------|-------------|-------|------------|-------|------------|-------|------------------------------------------|-------|------------------------------------------|-------|
| Elements                    | Functional form             | BE (eV)     | at. % | BE (eV)    | at. % | BE (eV)    | at. % | BE (eV)                                  | at. % | BE (eV)                                  | at. % |
| C                           | sp <sup>2</sup>             | 284.3       | 47.19 | 284.3      | 41.93 | 284.3      | 41.93 | 284.3                                    | 40.27 | 284.3                                    | 40.69 |
|                             | sp <sup>3</sup>             | 284.8       | 12.46 | 284.8      | 21.24 | 284.8      | 21.24 | 284.8                                    | 19.57 | 284.8                                    | 21.10 |
|                             | C-O                         | 285.8       | 16.73 | 286.0      | 12.32 | 286.0      | 12.32 | 285.9                                    | 14.39 | 286.0                                    | 12.98 |
|                             | C=O                         | 289.5       | 3.55  | 289.5      | 3.25  | 289.5      | 3.25  | 289.5                                    | 3.39  | 289.5                                    | 3.63  |
|                             | C=O                         | 287.7       | 5.43  | 287.7      | 5.76  | 287.7      | 5.76  | 287.7                                    | 5.5   | 287.7                                    | 5.47  |
|                             | pi-pi*                      | 291.4       | 6.94  | 291.3      | 7.41  | 291.3      | 7.41  | 291.3                                    | 7.05  | 291.4                                    | 6.71  |
|                             | Carbide                     | 283.0       | 3.95  | 283.0      | 3.89  | 283.0      | 3.89  | 283.0                                    | 3.8   | 283.0                                    | 3.84  |
| N                           | Imine                       | 397.5       | 0.17  | 397.7      | 0.16  | 397.7      | 0.16  | 397.3                                    | 0.07  | 397.5                                    | 0.14  |
|                             | Pyridinic                   | 398.4       | 0.64  | 398.4      | 0.55  | 398.4      | 0.55  | 398.4                                    | 0.91  | 398.4                                    | 0.90  |
|                             | Amines/Metal-N <sub>x</sub> | 399.4       | 0.31  | 399.2      | 0.56  | 399.2      | 0.56  | 399.4                                    | 0.62  | 399.2                                    | 0.58  |
|                             | Pyrrolic                    | 400.5       | 0.34  | 400.5      | 0.41  | 400.5      | 0.41  | 400.5                                    | 0.46  | 400.5                                    | 0.59  |
|                             | Graphitic                   | 401.8       | 0.18  | 401.6      | 0.21  | 401.6      | 0.21  | 401.5                                    | 0.35  | 401.7                                    | 0.25  |
|                             | Bulk N-H                    | 402.9       | 0.04  | 402.9      | 0.08  | 402.9      | 0.08  | 402.9                                    | 0.12  | 403.0                                    | 0.05  |
|                             | NO                          | 404.0       | 0.06  | 404.9      | 0.01  | 404.8      | 0.01  | 404.4                                    | 0.05  | 404.0                                    | 0.02  |
| <b>Metal oxide</b>          |                             | 530.0       | 0.18  | 530.2      | 0.32  | 530.3      | 0.25  | 530.1                                    | 0.03  | 530.1                                    | 0.39  |
| <b>O=C-OH carboxyl</b>      |                             | 531.2       | 0.49  | 531.2      | 0.36  | 531.2      | 0.46  | 531.2                                    | 0     | 531.2                                    | 0.77  |
| <b>C=O carbonyl</b>         |                             | 532.0       | 0.56  | 532.1      | 0.41  | 532.1      | 0.51  | 532.1                                    | 0.11  | 532.1                                    | 0.51  |
| <b>C-O</b>                  |                             | 532.9       | 0.51  | 532.9      | 0.37  | 532.9      | 0.27  | 532.9                                    | 0.07  | 532.9                                    | 0.38  |
| <b>C-OH</b>                 |                             | 533.9       | 0.21  | 533.8      | 0.22  | 533.8      | 0.21  | 533.9                                    | 0.05  | 533.9                                    | 0.21  |
| <b>Water, chemisorbed O</b> |                             | 535.2       | 0.08  | 535.3      | 0.07  | 535.5      | 0     | 535.0                                    | 0.03  | 535.0                                    | 0.01  |
| <b>Total Fe (at.%)</b>      |                             | -           |       | <b>0.1</b> |       |            |       | <b>0.34</b>                              |       | <b>0.2</b>                               |       |
| <b>Total Co (at.%)</b>      |                             | -           |       | <b>0</b>   |       | <b>0.5</b> |       | <b>0.41</b>                              |       | <b>0.6</b>                               |       |
| <b>Total N (at.%)</b>       |                             | <b>1.74</b> |       | <b>1.1</b> |       | <b>2.0</b> |       | <b>2.58</b>                              |       | <b>2.5</b>                               |       |

## Figures

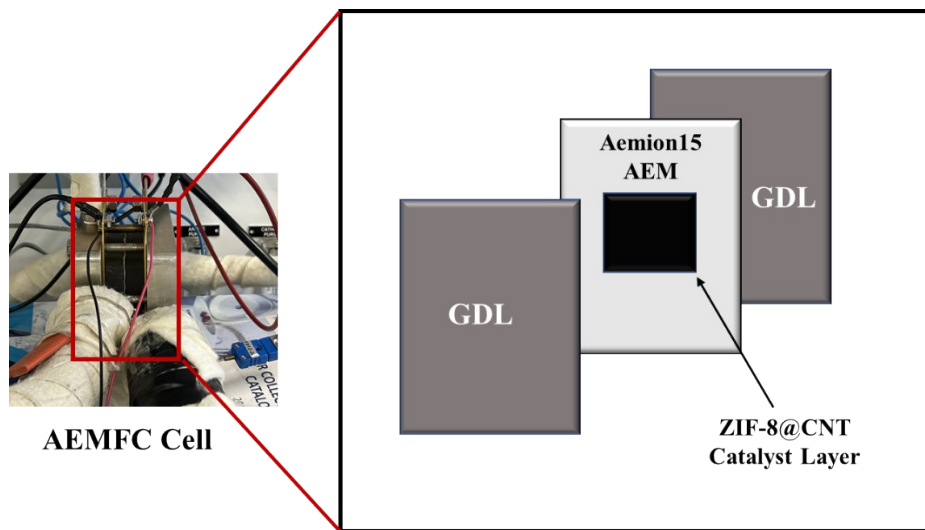

Fig. S1 Pictorial representation of the membrane-electrode assembly used for AEMFC tests.

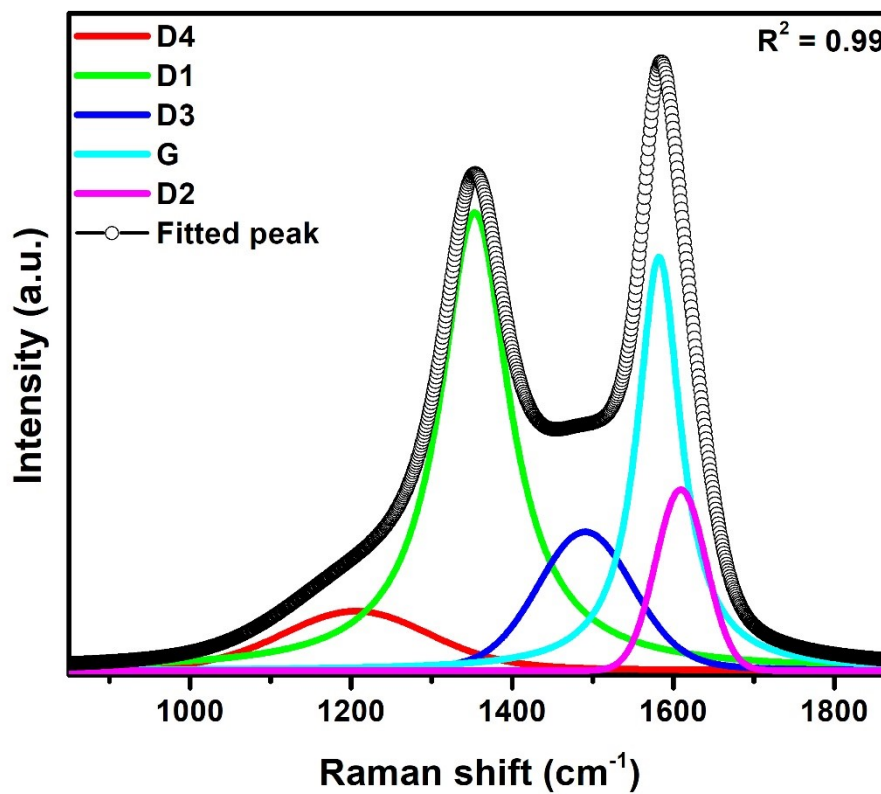

Fig. S2 Deconvoluted Raman spectra recorded for  $\text{Fe}_1\text{Co}_2\text{-ZNT-900}$  catalyst [ R-Square fitting parameter ( $R^2$ ) is 0.998].

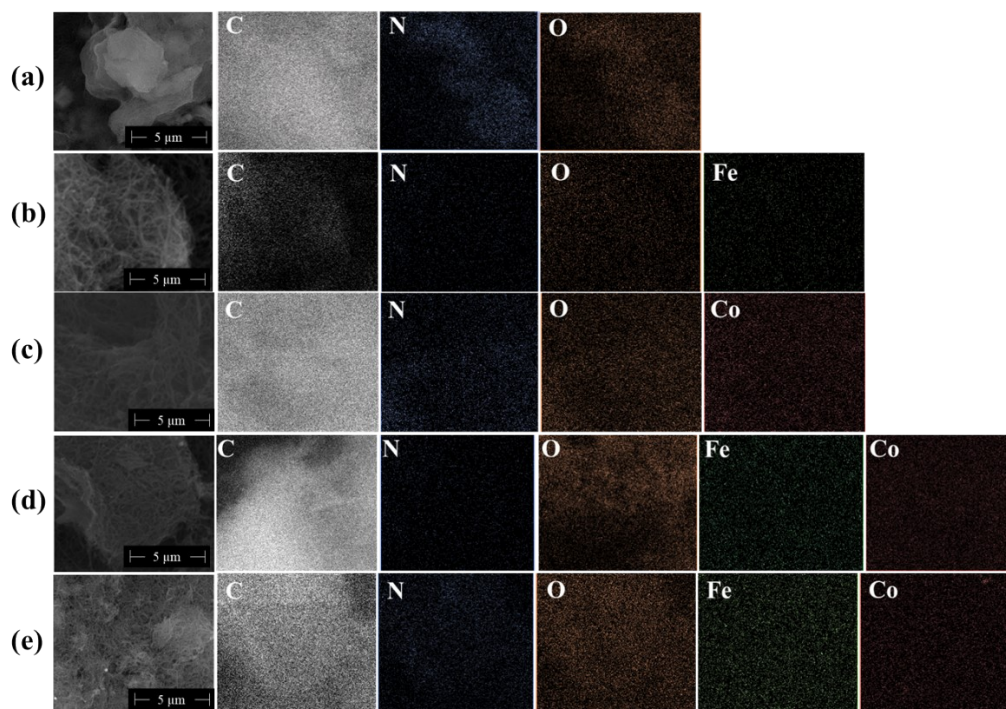

**Fig. S3** SEM-EDX analysis with elemental mapping of (a) ZNT-900, (b) Fe-ZNT-900 and (c) Co-ZNT-900, (d) Fe<sub>1</sub>Co<sub>1</sub>-ZNT-900 and (e) Fe<sub>1</sub>Co<sub>2</sub>-ZNT-900 catalysts.

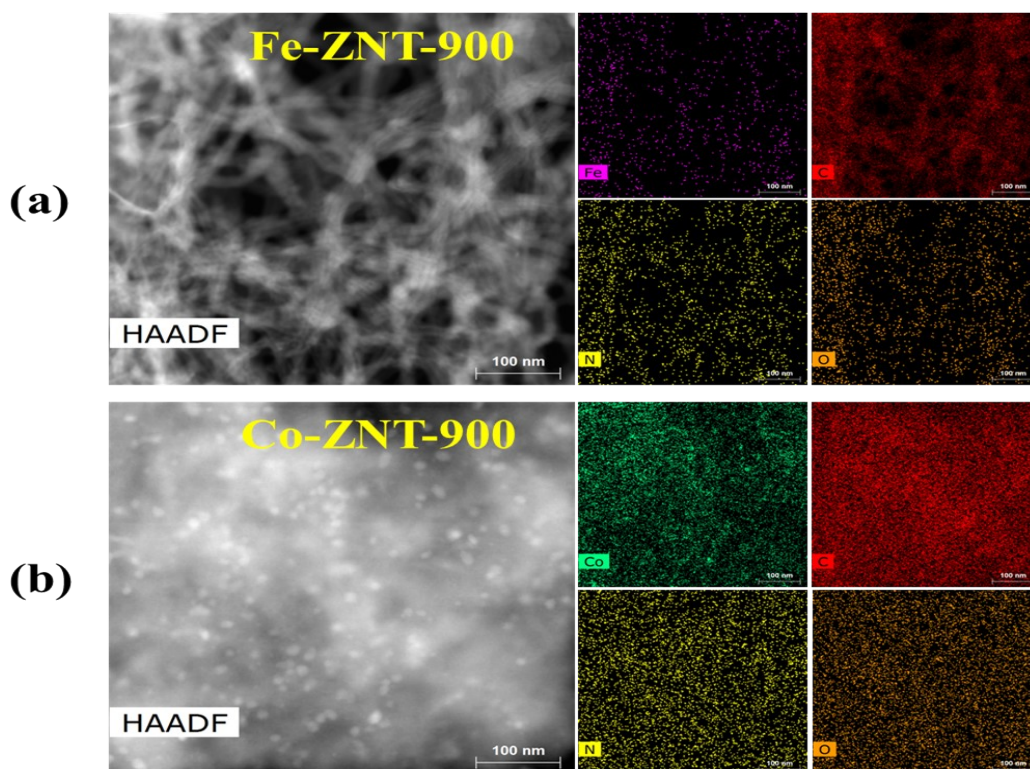

**Fig. S4.** HAADF-STEM images for (a) Fe-ZNT-900 and (b) Co-ZNT-900 catalysts captured at 100 nm with their corresponding EDX mapping for C, N and O elements.

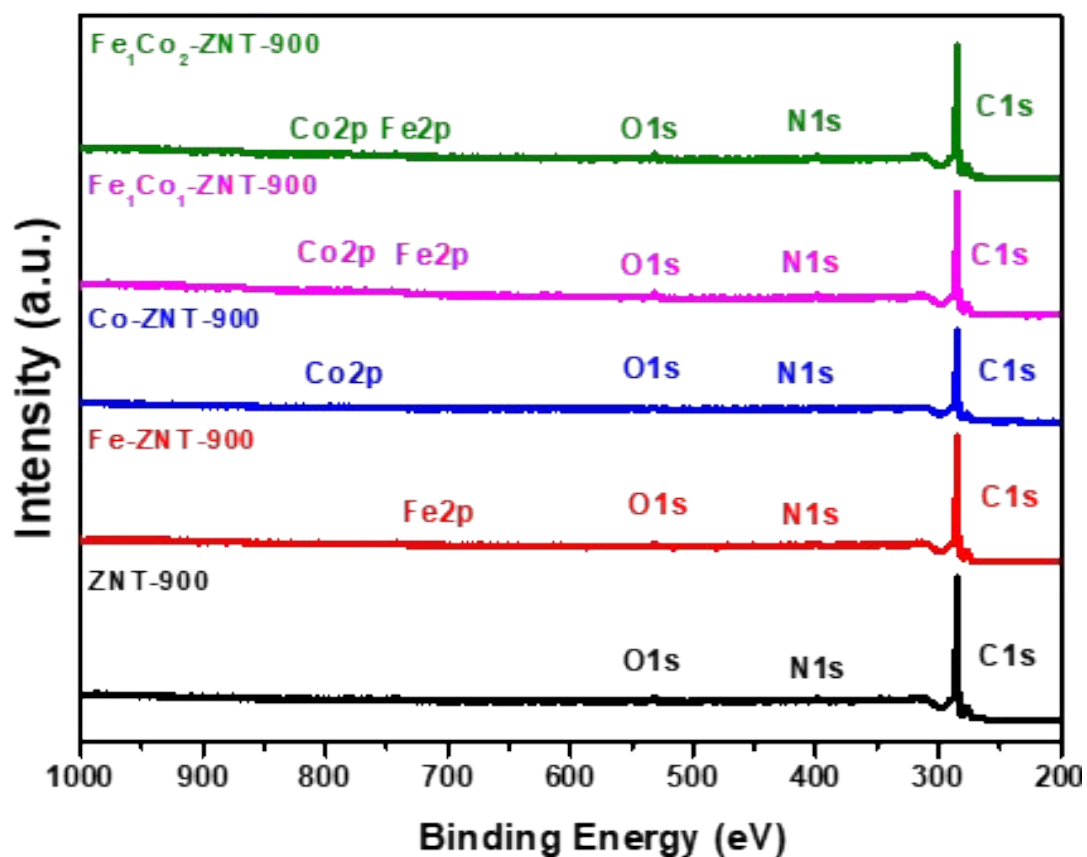

**Fig. S5.** XPS survey spectra of ZIF-8@CNT catalysts representing the presence of C, N, O, Fe and Co elements.

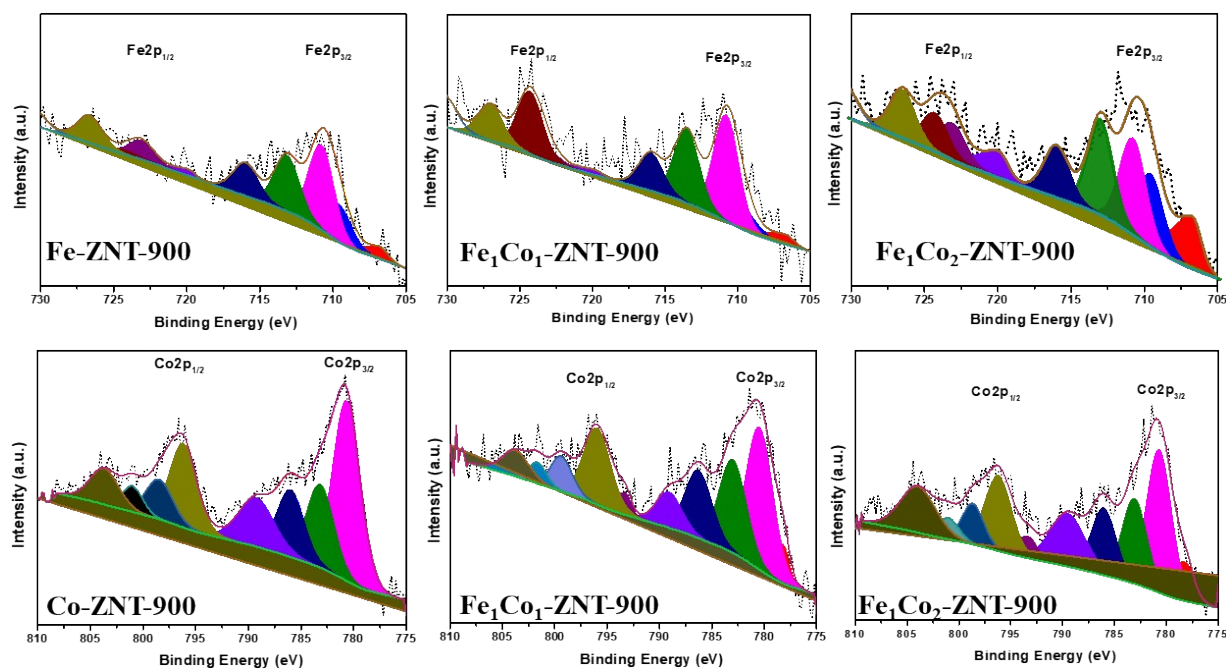

**Fig. S6.** High-resolution XPS spectra recorded in the Fe2p and Co2p regions for transition metal doped ZIF-8@CNT catalysts.

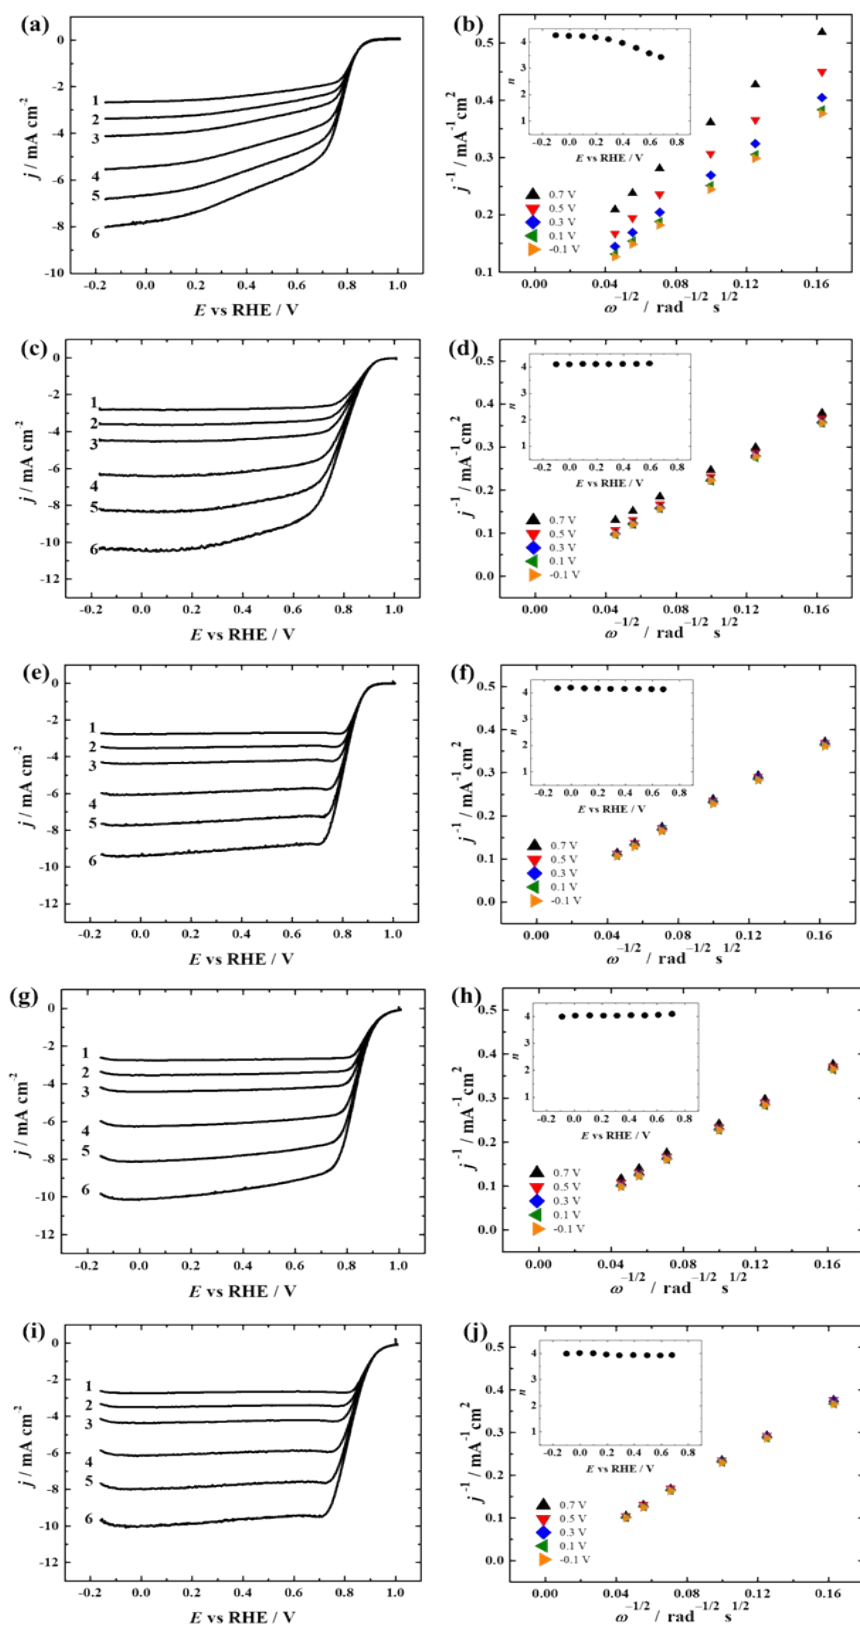

**Fig. S7.** The RDE voltammograms and K-L plots for oxygen reduction on (a, b) ZNT-900, (c, d) Fe-ZNT-900, (e, f) Co-ZNT-900, (g, h) Fe<sub>1</sub>Co<sub>1</sub>-ZNT-900 and (i, j) Fe<sub>1</sub>Co<sub>2</sub>-ZNT-900. Scan rate: 10 mV s<sup>-1</sup>. Rotation rate ( $\omega$ ): (1) 360, (2) 610, (3) 960, (4) 1900, (5) 3100 and (6) 4600 rpm. Insets to the K-L plots show the number of electrons transferred per O<sub>2</sub> molecule as a function of potential.
